# Supplementary material for: Gene expression of non-homologous end-joining pathways in the prognosis of ovarian cancer
Source: PubMed Central journal article supplement — iScience. 2023 Sep 15;26(10):107934. doi: 10.1016/j.isci.2023.107934 (PMC10558711; doi:10.1016/j.isci.2023.107934), 2023-09-15
Supplement: mmc1.pdf [file mmc1.pdf]

iScience, Volume 26

## **Supplemental information**

### **Gene expression of non-homologous end-joining pathways in the prognosis of ovarian cancer**

**Ethan S. Lavi, Z. Ping Lin, and Elena S. Ratner**

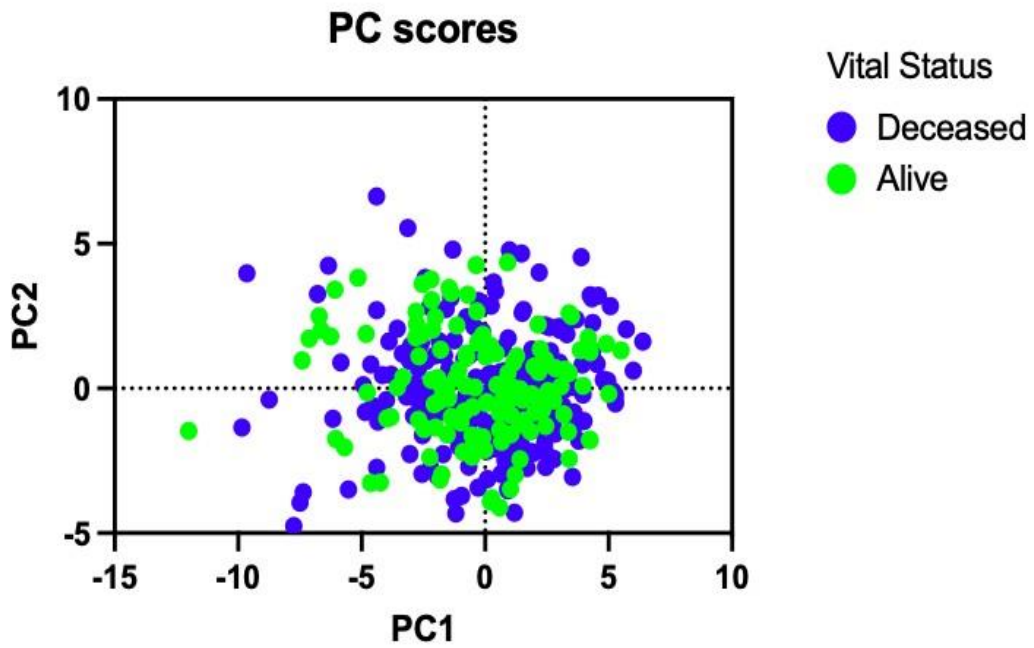

**Figure S1: PC Scores from the PCA analysis, related to Figure 3 and S2.** PC scores show the ability of the principal components to separate the deceased patients from living ones.

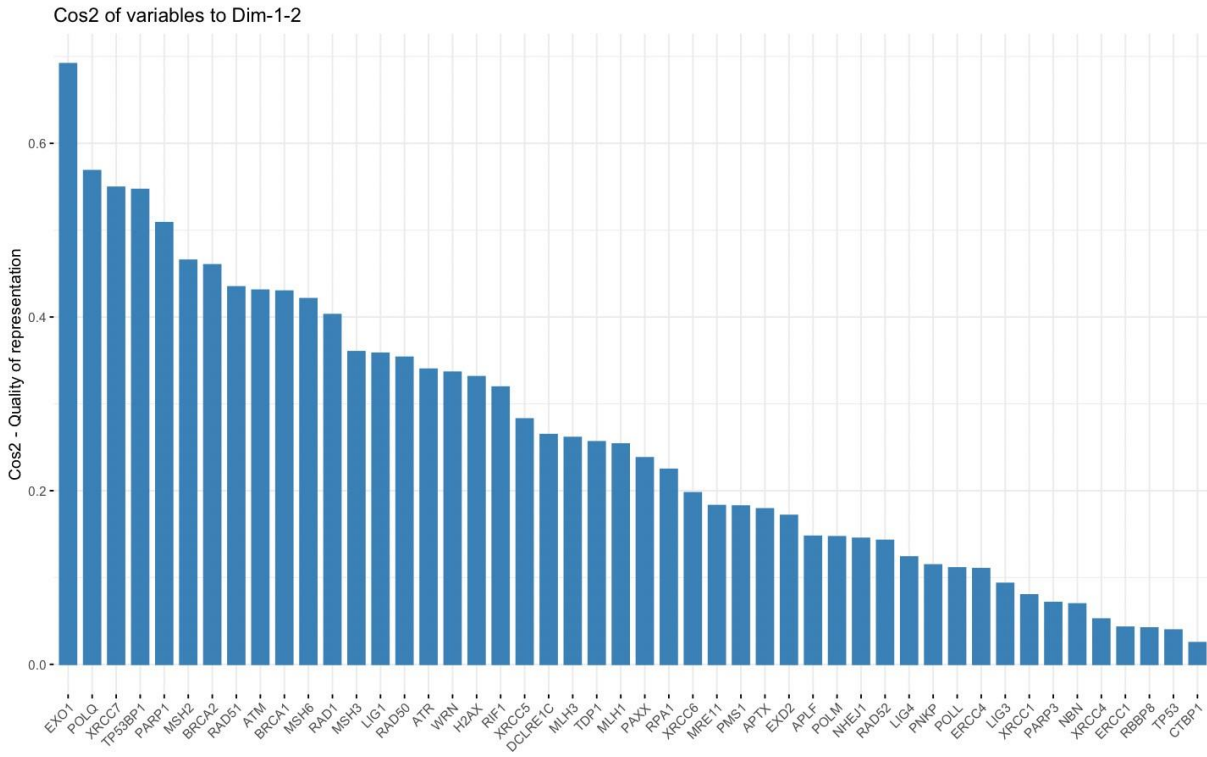

**Figure S2: Quality of representation in PCA, related to Figure 3 and S1.** The figure demonstrated the amount of importance each variable is to the principal components.

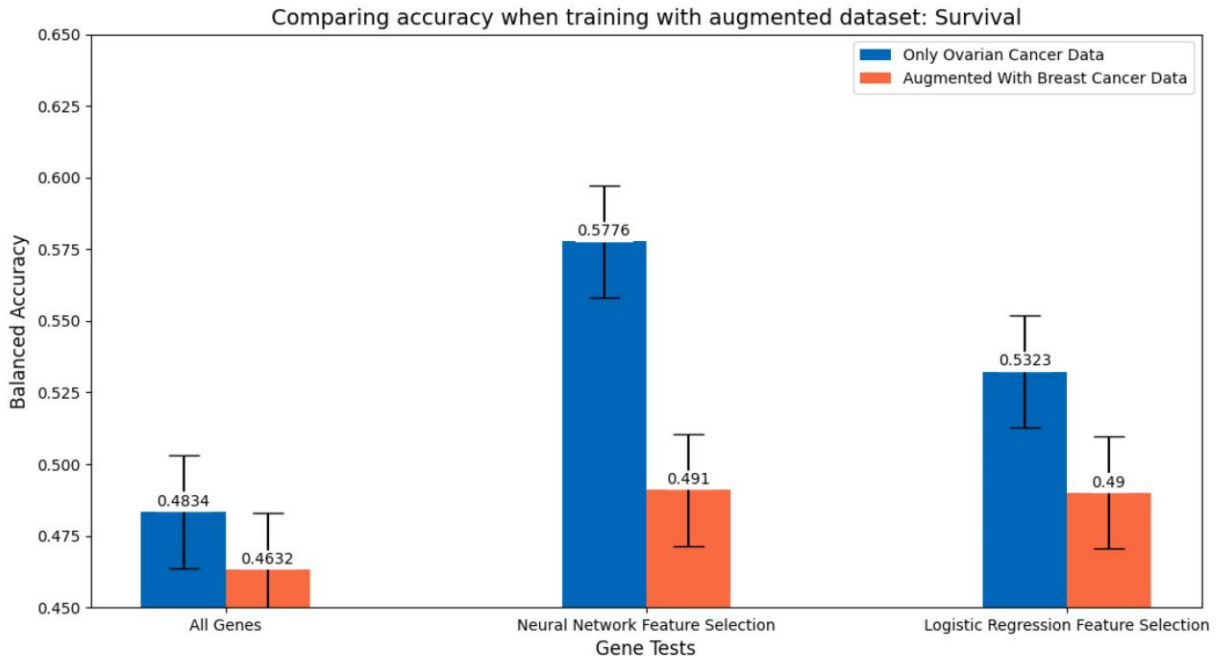

**Figure S3: Bar Graph of Neural Network Performance on Survival, related to Figure 4 and Table 1.** A bar graph was generated to compare the balanced accuracy of the neural network with and without the training augmentation of breast cancer data. Three gene sets were tested: all the genes, the best from the forward feature selection, and the logistic regression feature selection. The error bars represent a 95% confidence interval of the accuracy. The y-range was set from 0.45 to 0.65 for readability.

**Table S1: Linear regression of 48 genes into survival outcome conducted on the ovarian cancer dataset, related to Table 1.** Linear regression for the gene dataset was conducted and ordered based on their estimate. Positive estimates of gene expression are associated with improved survival whereas the negative estimates contribute to poor survival probability. Standard error, a t-value, and a p-value for each gene in the linear regression model was generated. p-values under 0.1 were bolded.

| Gene           | Estimate       | Std. Error   | t value       | Pr(> t )      |
|----------------|----------------|--------------|---------------|---------------|
| <b>TP53BP1</b> | <b>-559.54</b> | <b>258.8</b> | <b>-2.162</b> | <b>0.0314</b> |
| <b>RAD52</b>   | <b>-417.58</b> | <b>202.6</b> | <b>-2.061</b> | <b>0.0401</b> |
| MRE11          | -348.71        | 243.7        | -1.431        | 0.1534        |
| POLQ           | -335.92        | 311.1        | -1.080        | 0.2811        |
| XRCC5          | -319.71        | 232.5        | -1.375        | 0.1702        |
| XRCC1          | -255.42        | 226.2        | -1.129        | 0.2598        |
| XRCC7          | -193.28        | 260.2        | -0.743        | 0.4581        |
| APLF           | -169.09        | 209.8        | -0.806        | 0.4210        |
| EXD2           | -149.32        | 215.0        | -0.694        | 0.4879        |
| RIF1           | -103.60        | 245.9        | -0.421        | 0.6739        |
| PAXX           | -87.85         | 211.8        | -0.415        | 0.6786        |
| LIG3           | -81.23         | 179.7        | -0.452        | 0.6517        |
| ERCC1          | -80.89         | 229.1        | -0.353        | 0.7243        |
| MSH6           | -76.40         | 392.4        | -0.195        | 0.8458        |
| LIG4           | -73.72         | 198.5        | -0.371        | 0.7107        |
| RBBP8          | -70.87         | 183.1        | -0.387        | 0.6991        |
| ATR            | -70.15         | 257.9        | -0.272        | 0.7858        |
| XRCC6          | -38.29         | 207.3        | -0.185        | 0.8536        |
| EXO1           | -37.27         | 318.7        | -0.117        | 0.9070        |
| H2AX           | -31.00         | 219.7        | -0.141        | 0.8879        |
| NBN            | -28.98         | 197.7        | -0.147        | 0.8836        |
| XRCC4          | 11.11          | 225.4        | 0.049         | 0.9607        |
| RPA1           | 27.99          | 203.4        | 0.138         | 0.8907        |
| BRCA1          | 34.42          | 239.0        | 0.144         | 0.8856        |
| RAD50          | 41.05          | 211.2        | 0.194         | 0.8460        |
| PNKP           | 48.57          | 239.1        | 0.203         | 0.8392        |
| RAD1           | 80.71          | 215.7        | 0.374         | 0.7086        |
| NHEJ1          | 97.53          | 228.2        | 0.427         | 0.6694        |
| MLH1           | 111.45         | 220.1        | 0.506         | 0.6130        |
| MSH3           | 115.70         | 259.4        | 0.446         | 0.6559        |
| TP53           | 117.34         | 180.3        | 0.651         | 0.5157        |
| ERCC4          | 119.53         | 195.0        | 0.613         | 0.5404        |
| LIG1           | 132.53         | 268.3        | 0.494         | 0.6217        |
| MSH2           | 132.93         | 393.9        | 0.337         | 0.7360        |
| RAD51          | 137.34         | 248.2        | 0.553         | 0.5805        |
| DCLRE1C        | 148.59         | 218.8        | 0.679         | 0.4976        |
| WRN            | 201.48         | 214.6        | 0.938         | 0.3487        |
| PARP1          | 224.75         | 265.2        | 0.847         | 0.3974        |
| POLM           | 225.56         | 202.9        | 1.111         | 0.2672        |
| PARP3          | 245.27         | 194.0        | 1.264         | 0.2070        |
| TDP1           | 265.13         | 229.4        | 1.156         | 0.2487        |
| POLL           | 267.05         | 196.6        | 1.358         | 0.1753        |
| CTBP1          | 281.03         | 191.7        | 1.466         | 0.1437        |
| MLH3           | 281.51         | 218.2        | 1.290         | 0.1981        |
| BRCA2          | 311.74         | 244.0        | 1.278         | 0.2023        |
| <b>PMS1</b>    | <b>345.51</b>  | <b>191.3</b> | <b>1.806</b>  | <b>0.0719</b> |
| <b>APTX</b>    | <b>347.87</b>  | <b>198.9</b> | <b>1.748</b>  | <b>0.0814</b> |
| ATM            | 366.40         | 278.3        | 1.316         | 0.1891        |

**Table S2: Aggregated balanced accuracies, related to Star Methods.** The balanced accuracy metric from the logistic regression, decision tree, naïve-bayes, support vector machine, and neural network classifiers over survival, progression and recurrence were aggregated into a table. The best performance in each of the three prognosis outcomes categories are bolded.

| Model               | Survival      | Progression   | Recurrence    |
|---------------------|---------------|---------------|---------------|
| Logistic Regression | 0.5000        | 0.5185        | <b>0.6397</b> |
| Decision Tree       | 0.5386        | 0.5605        | 0.5101        |
| Naive Bayes         | 0.5244        | 0.5040        | 0.5536        |
| SVM                 | <b>0.5887</b> | 0.5300        | 0.6301        |
| Neural Network      | 0.5776        | <b>0.6310</b> | 0.5953        |

**Table S3: Model Baseline Accuracies, related to Table S2 and Star Methods.** The assorted machine learning models for this paper were recreated on 100 datasets with randomly generated data. Then, the calculated balanced accuracies along with the number of genes with a significant P-Value were recorded. Using the resulting values, the average and 95% percentile was calculated.

| Model                     | Average | 95% Percentile |
|---------------------------|---------|----------------|
| Logistic Regression       | 0.4985  | 0.5223         |
| Decision Tree             | 0.4966  | 0.5546         |
| Naive Bayes               | 0.4978  | 0.5480         |
| SVM (Linear Kernel)       | 0.5000  | 0.5000         |
| SVM (Radial Kernel)       | 0.4994  | 0.5322         |
| SVM (Sigmoid Kernel)      | 0.4990  | 0.5425         |
| SVM (Polynomial Kernel)   | 0.5008  | 0.5271         |
| Significant P-Value Count | 4.64    | 9              |
